# Supplementary material for: Colorectal cancer and adenoma screening using urinary volatile organic compound (VOC) detection: early results from a single-centre bowel screening population (UK BCSP)
Source: Springer Nature journal article supplement (doi:10.1007/s10151-019-01963-6), 2019-04-01

**Journal:** Techniques in coloproctology

**Title:**

Colorectal cancer and adenoma screening using urinary volatile organic compound (VOC) detection – Early results from a single centre bowel screening population (UK BCSP)

**Authors:**

Mozdiak E<sup>1</sup>, Wicaksono AN<sup>2</sup>, Covington JA<sup>2</sup>, Arasaradnam RP<sup>1</sup>

**Corresponding author:**

Dr E Mozdiak, email: ella.mozdiak@nhs.net

Raw VOC data analysis pipeline for FAIMS and GC-IMS.

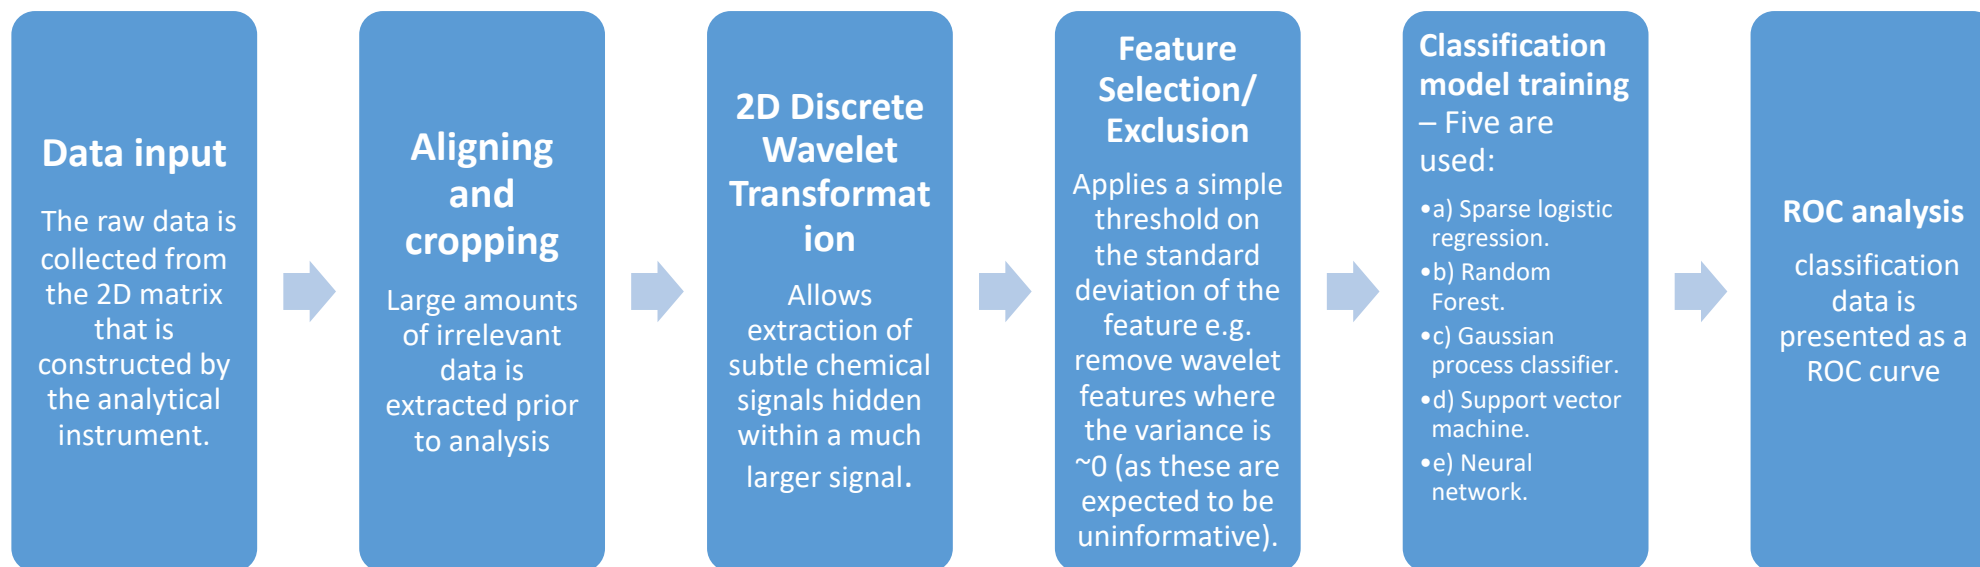

Supplement: MOESM2 [file 16656754]
